# Supplementary material for: Fluorescence Lectin Bar-Coding of Glycoconjugates in the Extracellular Matrix of Biofilm and Bioaggregate Forming Microorganisms
Source: PubMed Central journal article supplement (PMC5374382; doi:10.3390/microorganisms5010005), 2017-02-10
Supplement: microorganisms-05-00005-s001.pdf [file microorganisms-05-00005-s001.pdf]

**Supplementary Table 1:** Overview of lectins available, sorted according to their three-letter code.

| Nr. | Lectin                         |                         |               | Fluo label         | Inhibiting carbohydrate           | Linkage type                                                                                                                         | Supplier <sup>1)</sup> |
|-----|--------------------------------|-------------------------|---------------|--------------------|-----------------------------------|--------------------------------------------------------------------------------------------------------------------------------------|------------------------|
|     | Latin name                     | Common name             | 3-letter code |                    |                                   |                                                                                                                                      |                        |
| 1   | <i>Anguilla anguilla</i>       | fresh water eel         | AAA           | FITC               | $\alpha$ -Fuc                     |                                                                                                                                      | EY Labs                |
| 2   | <i>Aleuria aurantia</i>        | mushroom                | AAL           | Alexa488, Fluores. | $\alpha$ -Fuc                     | Fuc( $\alpha$ 1,6)GlcNAc, Fuc( $\alpha$ 1,3)GalNAc, Fuc( $\alpha$ 1,2)Gal( $\beta$ 1,4)[Fuc( $\alpha$ 1,3/4)]Gal( $\beta$ 1,4)GlcNAc | <b>Vector Labs</b>     |
| 3   | <i>Agaricus bisporus</i>       | mushroom                | ABA           | FITC               | $\alpha$ -Gal                     | Gal( $\beta$ 1,3)GalNAc                                                                                                              | EY Labs                |
| 4   | <i>Amaranthus caudatus</i>     | Inka wheat              | ACA           | FITC               |                                   | Gal( $\beta$ 1,3)GalNAc                                                                                                              | EY Labs                |
| 5   | <i>Artocarpus integrifolia</i> | jackfruit               | AIA           | FITC               | $\beta$ -Gal                      | Gal( $\beta$ 1,3) GalNAc                                                                                                             | EY Labs                |
| 6   | <i>Allomyrina dichotoma</i>    | Japanese beetle         | AlloA         | FITC               | $\beta$ -Gal                      |                                                                                                                                      |                        |
| 7   | <i>Arum maculatum</i>          | lords and ladies tubers | AMA           | FITC               |                                   | Man                                                                                                                                  | EY Labs                |
| 8   | <i>Aegopodium podagraria</i>   | ground elder            | APP           | FITC               | $\alpha$ -GalNAc, $\beta$ -GalNAc | not determined                                                                                                                       | EY Labs                |
| 9   | <i>Allium sativum</i>          | garlic                  | ASA           | FITC               | $\alpha$ -Man                     | D-Man( $\alpha$ 1,3)                                                                                                                 | EY Labs                |
| 10  | <i>Musa paradisiaca</i>        | banana                  | Ban           | Fluores.           | Glc, Man                          | ( $\alpha$ 1,3) glucosyl- and mannosyl- residues                                                                                     | Vector Labs            |
| 11  | <i>Bryonia dioica</i>          | white bryony            | BDA           | FITC               | $\alpha$ -GalNAc, $\beta$ -GalNAc | not determined                                                                                                                       | EY Labs                |
| 12  | <i>Bauhinia purpurea</i>       | camel's foot tree       | BPA           | FITC               | $\alpha$ -GalNAc, $\beta$ -GalNAc |                                                                                                                                      | EY Labs                |
| 13  | <i>Colchicum autumnale</i>     | autumn crocus           | CA            | FITC               |                                   | not determined                                                                                                                       | EY Labs                |

|    |                                 |                     |         |          |                                                                      |                                                                  |                |
|----|---------------------------------|---------------------|---------|----------|----------------------------------------------------------------------|------------------------------------------------------------------|----------------|
| 14 | <i>Caragana aborescens</i>      | pea tree            | CAA     | FITC     | $\alpha$ -Gal, $\beta$ -Gal,<br>$\alpha$ -GalNAc,<br>$\beta$ -GalNAc |                                                                  | EY Labs        |
| 15 | <i>Calystega sepium</i>         | hedge bindweed      | Calsepa | FITC     |                                                                      | Man>Glc>Fuc>GlcNAc                                               | EY Labs        |
| 16 | <i>Cancer antennarius</i>       | California crab     | CCA     | Alexa488 | sialic acid                                                          | 9-O-Ac-NeuAc>4-O-Ac-NeuAc                                        | <b>EY Labs</b> |
| 17 | <i>Codium fragile</i>           | green sea fingers   | Co      | Alexa488 | GalNAc                                                               |                                                                  | <b>Sigma</b>   |
| 18 | <i>Canavalia ensiformis</i>     | jack bean           | ConA    | FITC     | $\alpha$ -Man, $\alpha$ -Glc,<br>$\alpha$ -GlcNAc                    | branched Man                                                     | Sigma          |
| 19 | <i>Cicer arietinum</i>          | chick pea           | CPA     | FITC     |                                                                      | Not determined                                                   | EY Labs        |
| 20 | <i>Cytisus scoparius</i>        | Scotch broom        | CSA     | FITC     | $\beta$ -Gal                                                         | lactose                                                          | EY Labs        |
| 21 | <i>Dolichos biflorus</i>        | horse gram          | DBA     | FITC     | $\alpha$ -GalNAc                                                     | GalNAc( $\alpha$ 1,3)GalNAc                                      | Sigma          |
| 22 | <i>Dioclea grandiflora</i>      |                     | DGL     | FITC     | Man, Glc                                                             |                                                                  | EY Labs        |
| 23 | <i>Datura stramonium</i>        | jimson weed         | DSA     | FITC     | $\beta$ -GlcNAc                                                      | GlcNAc( $\beta$ 1,4)GlcNAc oligomers,<br>Gal( $\beta$ 1,4)GlcNAc | EY Labs        |
| 24 | <i>Erythrina cristagalli</i>    | cockspur coral tree | ECA     | FITC     | $\alpha$ -Gal, $\beta$ -Gal,<br>$\alpha$ -GalNAc,<br>$\beta$ -GalNAc | Gal( $\beta$ 1,4)GlcNAc                                          | EY Labs        |
| 25 | <i>Erythrina corallodendron</i> | coral tree          | Ecor    | Alexa488 | Gal, GalNAc                                                          |                                                                  | <b>Sigma</b>   |
| 26 | <i>Euonymus europaeus</i>       | spindle tree        | EEA     | FITC     |                                                                      | Gal( $\alpha$ 1,3)[Fuc( $\alpha$ 1,2)]<br>Gal                    | EY Labs        |
| 27 | <i>Glechoma hederacea</i>       | ground ivy          | GHA     | FITC     | GalNAc                                                               |                                                                  | EY Labs        |
| 28 | <i>Galanthus nivalis</i>        | snowdrop            | GNA     | FITC     | $\alpha$ -Man                                                        | Man( $\alpha$ 1,3)Man                                            | EY Labs        |
| 29 | <i>Griffonia simplicifolia</i>  |                     | GS-I    | FITC     | $\alpha$ -GlcNAc,<br>$\alpha$ -Gal                                   |                                                                  | Sigma          |
| 30 | <i>Helix aspersa</i>            | garden snail        | HAA     | FITC     | $\alpha$ -GlcNAc,<br>$\alpha$ -GalNAc                                | not determined                                                   | EY Labs        |

|    |                                |                    |       |                   |                                                    |                                                                                                                                      |                |
|----|--------------------------------|--------------------|-------|-------------------|----------------------------------------------------|--------------------------------------------------------------------------------------------------------------------------------------|----------------|
| 31 | <i>Hippeastrum hybrid</i>      | amaryllis          | HHA   | FITC              | $\alpha$ -Man                                      | Man( $\alpha$ 1,3) Man( $\alpha$ 1,3)<br>Man( $\alpha$ 1,3)<br>Man( $\alpha$ 1,2)Man                                                 | EY Labs        |
| 32 | <i>Homarus americanus</i>      | California lobster | HMA   | Alexa488,<br>FITC | Sialic Acid,<br>$\alpha$ -Fuc,<br>$\alpha$ -GalNAc |                                                                                                                                      | EY Labs        |
| 33 | <i>Helix pomatia</i>           | edible snail       | HPA   | FITC              | $\alpha$ -GalNAc                                   | not determined                                                                                                                       | Sigma          |
| 34 | <i>Iberis amara</i>            | candy tuft         | IAA   | Alexa488          |                                                    | not determined                                                                                                                       | <b>EY Labs</b> |
| 35 | <i>Iris hybrid</i>             | dutch Iris         | IRA   | FITC              |                                                    |                                                                                                                                      | EY Labs        |
| 36 | <i>Laburnum alpinum</i>        | Scotch alburnum    | LAA   | FITC              | $\beta$ -GlcNAc                                    | GlcNAc( $\beta$ 1,4)GlcNAc                                                                                                           | EY Labs        |
| 37 | <i>Laburnum anagyroides</i>    | golden chain/rain  | LAL   | FITC              | $\alpha$ -Me-L-Fuc                                 | Fuc( $\alpha$ 1,2)Gal( $\beta$ 1,4)Glu<br>and<br>Fuc( $\alpha$ 1,2)Ga( $\beta$ 1,4)Glc(<br>$\beta$ 1,6)GalNAc[( $\beta$ 1,3)<br>Gal] | EY Labs        |
| 38 | <i>Phaseolus lunatus</i>       | lima bean          | LBA   | FITC              | $\alpha$ -GalNAc                                   | GalNAc( $\alpha$ 1,3)[Fuc-<br>( $\alpha$ 1,2)]Gal                                                                                    | EY Labs        |
| 39 | <i>Lens culinaris</i>          | lentil             | LcH   | FITC              | $\alpha$ -Man, $\alpha$ -Glc,<br>$\alpha$ -GlcNAc  | branched Man with $\alpha$ -<br>Fuc as determinant                                                                                   | EY Labs        |
| 40 | <i>Lycopersicon esculentum</i> | tomato             | LEA   | FITC              | $\beta$ -GlcNAc                                    | GlcNAc( $\beta$ 1,4)GlcNAc<br>oligomers                                                                                              | Sigma          |
| 41 | <i>Limax flavus</i>            | garden slug        | LFA   | FITC              | sialic acid                                        |                                                                                                                                      | EY Labs        |
| 42 | <i>Tetragonolobus purpurea</i> | asparagus pea      | Lotus | FITC              | $\alpha$ -Fuc                                      | Fuc( $\alpha$ 1,2)Gal( $\beta$ 1,4)[Fuc<br>( $\alpha$ 1)]GlcNAc                                                                      | Sigma          |
| 43 | <i>Limulus polyphemus</i>      | horseshoe crab     | LPA   | FITC              | sialic acid                                        |                                                                                                                                      | EY Labs        |
| 44 | <i>Maackia amurensis</i>       | maackia            | MAA   | FITC              | sialic acid, Gal                                   |                                                                                                                                      | EY Labs        |
| 45 | <i>Mangifera indica</i>        | mango              | MIA   | Alexa488          |                                                    |                                                                                                                                      | <b>EY Labs</b> |
| 46 | <i>Morniga G</i>               | black mulberry     | MNA-G | FITC              |                                                    | Gal                                                                                                                                  | EY Labs        |

|    |                                        |                      |       |          |                                                        |                                                                                         |                |
|----|----------------------------------------|----------------------|-------|----------|--------------------------------------------------------|-----------------------------------------------------------------------------------------|----------------|
| 47 | <i>Marasmius oreades</i>               | mushroom             | MOA   | FITC     |                                                        | Gal( $\alpha$ 1,3)Gal,<br>Gal( $\alpha$ 1,3)Gal( $\beta$ 1,4)GlcN<br>Ac/Glc             | EY Labs        |
| 48 | <i>Maclura pomifera</i>                | osage orange         | MPA   | FITC     | $\alpha$ -Gal,<br>$\alpha$ -GalNAc                     | Gal( $\beta$ 1,3)GalNAc                                                                 | EY Labs        |
| 49 | <i>Narcissus<br/>pseudonarcissus</i>   | daffodil             | NPA   | FITC     |                                                        | Not determined                                                                          | EY Labs        |
| 50 | <i>Persea americana</i>                | avocado              | PAA   | Alexa488 |                                                        |                                                                                         | <b>EY Labs</b> |
| 51 | <i>Pseudomonas aeruginosa</i>          |                      | PA-I  | Alexa488 | Gal                                                    |                                                                                         | <b>Sigma</b>   |
| 52 | <i>Phaseolus vulgaris</i>              | red kidney bean      | PHA-E | FITC     |                                                        | Gal                                                                                     | EY Labs        |
| 53 | <i>Phaseolus vulgaris</i>              | red kidney bean      | PHA-L | FITC     |                                                        | Gal, GlcNAc, Man                                                                        | EY Labs        |
| 54 | <i>Polygonatum multiflorum</i>         | solomon`s seal       | PMA   | FITC     |                                                        | Man                                                                                     | EY Labs        |
| 55 | <i>Arachis hypogaea</i>                | peanut               | PNA   | FITC     | $\beta$ -Gal                                           | Gal( $\beta$ 1,3)GalNAc                                                                 | EY Labs        |
| 56 | <i>Ptilota plumosa</i>                 | red marine algae     | PPA   | Alexa488 |                                                        |                                                                                         | <b>Sigma</b>   |
| 57 | <i>Pisum sativum</i>                   | garden pea           | PSA   | FITC     | $\alpha$ -Man, $\alpha$ -Glc,<br>$\alpha$ -GlcNAc      | branched Man with $\alpha$ -<br>Fuc as determinant                                      | Sigma          |
| 58 | <i>Polyporus squamosus</i>             | mushroom             | PSL   | FITC     |                                                        | Neu5Ac( $\alpha$ 2,6)Gal( $\beta$ 1,4)<br>GlcNAc                                        | EY Labs        |
| 59 | <i>Psophocarpus<br/>tetragonolobus</i> | winged bean          | PTA   | FITC     | $\beta$ -Gal, $\alpha$ -<br>GalNAc,<br>$\beta$ -GalNAc | Gal                                                                                     | EY Labs        |
| 60 | <i>Phytolacca americana</i>            | pokeweed             | PWA   | FITC     | $\beta$ -GalNAc                                        | GlcNAc( $\beta$ 1,4)GlcNAc<br>oligomers and [Gal-<br>( $\beta$ 1,4)GlcNAc] <sub>2</sub> | EY Labs        |
| 61 | <i>Robinia pseudoaccacia</i>           | black locust         | RPA   | FITC     |                                                        | not determined                                                                          | EY Labs        |
| 62 | <i>Ricinus communis</i>                |                      | RCA   | Fluo     | Gal, GalNAc                                            |                                                                                         | Vector Labs    |
| 63 | <i>Trifolium repens</i>                | white clover         | RTA   | Alexa488 |                                                        |                                                                                         | <b>EY Labs</b> |
| 64 | <i>Glycine max</i>                     | soybean              | SBA   | FITC     | $\alpha$ -GalNAc, $\beta$ -<br>GalNAc                  | GalNAc( $\alpha$ 1,3)Gal                                                                | EY Labs        |
| 65 | <i>Sophora japonica</i>                | Japanese pagoda tree | SJA   | FITC     | $\beta$ -GalNAc                                        | GalNAc( $\beta$ 1,6)Gal                                                                 | EY Labs        |

|    |                                  |                       |     |                |                                                |                                                |                       |
|----|----------------------------------|-----------------------|-----|----------------|------------------------------------------------|------------------------------------------------|-----------------------|
| 66 | <i>Salvia horminum</i>           |                       | SHA | Alexa488       | GalNAc                                         |                                                | EY Labs               |
| 67 | <i>Sambucus nigra</i>            | elderberry            | SNA | Fluo           | $\beta$ -Gal, sialic acid                      | ( $\alpha$ 2,6)Gal, GalNAc                     | EY Labs               |
| 68 | <i>Salvia sclarea</i>            |                       | SSA | FITC           | GalNAc                                         |                                                | EY Labs               |
| 69 | <i>Sarothamnus scoparius</i>     |                       | SSC | Alexa488       |                                                |                                                | EY Labs               |
| 70 | <i>Solanum tuberosum</i>         | potato                | STA | FITC           | $\beta$ -GlcNAc                                | GlcNAc( $\beta$ 1,4)GlcNAc oligomers           | EY Labs               |
| 71 | <i>Trichosanthes kirilowii</i>   | Chinese cucumber      | TKA | FITC           | $\beta$ -Gal                                   | lactose                                        | EY Labs               |
| 72 | <i>Tulipa sp</i>                 | tulip                 | TL  | FITC           | $\alpha$ -GalNAc, $\beta$ -GalNAc              | GalNAc, Gal, Fuc                               | EY Labs               |
| 73 | <i>Tritrichomonas mobilensis</i> |                       | TML | Alexa488       |                                                |                                                | not available anymore |
| 74 | <i>Urtica dioica</i>             | stinging nettle       | UDA | FITC           | $\beta$ -GlcNAc                                | not determined                                 | EY Labs               |
| 75 | <i>Ulex europaeus</i>            | gorse or furze        | UEA | FITC           | $\beta$ -GlcNAc, $\alpha$ -Fuc                 | L-Fuc( $\alpha$ -1,2)Gal( $\beta$ 1,4)-GlcNAc  | Sigma                 |
| 76 | <i>Vicia faba</i>                | fava bean, broad bean | VFA | FITC           | $\alpha$ -Man, $\alpha$ -Glc, $\alpha$ -GlcNAc | branched Man with $\alpha$ -Fuc as determinant | EY Labs               |
| 77 | <i>Vicia graminea</i>            |                       | VGA | Alexa488, FITC |                                                | O-linked Gal( $\beta$ 1,3)GalNAc               | EY Labs               |
| 78 | <i>Vigna radiata</i>             | mung bean             | VRA | FITC           | $\alpha$ -Gal                                  |                                                | EY Labs               |
| 79 | <i>Vicia villosa</i>             | hairy vetch           | VVA | FITC           | $\alpha$ -Man; $\alpha$ -GalNAc                | Man, GalNAc( $\alpha$ 1,3)Gal                  | EY Labs               |
| 80 | <i>Wisteria floribunda</i>       | japanese wisteria     | WFA | FITC           | $\alpha$ -GalNAc, $\beta$ -GalNAc              | GalNAc( $\alpha$ 1,6)Gal                       | EY Labs               |
| 81 | <i>Triticum vulgaris</i>         | wheat                 | WGA | FITC           | $\beta$ -GlcNAc; Sialic acid                   | GlcNAc( $\beta$ 1,4)GlcNAc                     | Sigma                 |

<sup>1)</sup> self-labelled Alexa488 lectins printed in bold
